1 **Research Article**

2 **Mitochondrial genomes infer phylogenetic relationships among the**  
3 **oldest extant winged insects (Palaeoptera)**

4 Sereina Rutschmann<sup>1,2,3</sup>, Ping Chen<sup>4</sup>, Changfa Zhou<sup>4</sup>, Michael T. Monaghan<sup>1,2\*</sup>

5 **Addresses:**

6 <sup>1</sup>Leibniz-Institute of Freshwater Ecology and Inland Fisheries (IGB), Müggelseedamm 301, 12587  
7 Berlin, Germany

8 <sup>2</sup>Berlin Center for Genomics in Biodiversity Research, Königin-Luise-Straße 6-8, 14195 Berlin,  
9 Germany

10 <sup>3</sup>Department of Biochemistry, Genetics and Immunology, University of Vigo, 36310 Vigo, Spain

11 <sup>4</sup>The Key Laboratory of Jiangsu Biodiversity and Biotechnology, College of Life Sciences, Nanjing  
12 Normal University, Nanjing 210046, China

13 [sereina.rutschmann@gmail.com](mailto:sereina.rutschmann@gmail.com); [pings918@hotmail.com](mailto:pings918@hotmail.com); [zhouchangfa@njnu.edu.cn](mailto:zhouchangfa@njnu.edu.cn);  
14 [monaghan@igb-berlin.de](mailto:monaghan@igb-berlin.de)

15

16 **\*Correspondence:** [sereina.rutschmann@gmail.com](mailto:sereina.rutschmann@gmail.com)

17 Department of Biochemistry, Genetics, and Immunology, University of Vigo, 36310 Vigo, Spain

18

19

20

21 **Abstract**

22 **Background:** The relationships among the oldest winged insects (Palaeoptera), including the  
23 Ephemeroptera (mayflies) and Odonata (dragonflies and damselflies), remain unclear. The  
24 Palaeoptera together with the Neoptera have evolved as result of a rapid divergence from a common  
25 ancestor in the distant past. Thus they are thought to be more susceptible to systematic inadequacies,  
26 including taxon sampling, choice of outgroup, marker selection, and phylogenetic methods. Here we  
27 reconstruct their phylogenetic relationship using newly sequenced mitochondrial genomes in  
28 combination with 90 additional insect mitochondrial genomes. In particular, we investigate the  
29 impact of the increased mayfly taxon sampling, the effect of rogue taxa, and the used phylogenetic  
30 framework (Bayesian inference (BI) vs. maximum likelihood (ML)) approach.

31 **Results: We found support for** the clustering of the Odonata as most ancient, extant winged  
32 insects, using BI based on an optimized data matrix. Overall, we found no support for the basal  
33 Ephemeroptera clustering and the sister relationship between the Ephemeroptera and Odonata. Our  
34 newly sequenced mitochondrial genomes of *Baetis rutilocylindratus*, *Cloeon dipterum*, and  
35 *Habrophlebiodes zijinensis* showed the complete set of 13 protein coding genes and a conserved  
36 gene orientation with the exception of two inverted tRNAs for *H. zijinensis*.

37 **Conclusions:** The increase of palaeopteran taxon sampling in combination with a Bayesian  
38 phylogenetic framework was crucial to infer phylogenetic relationships within the three ancient  
39 insect lineages of Odonata, Ephemeroptera, and Neoptera. Pruning of rogue taxa improved the  
40 number of supported nodes in all phylogenetic trees. It remains to be tested whether an increased  
41 taxon sampling might also reveal the elusive phylogenetic positions of other insect orders.

42 **Keywords:** Baetidae, Bayesian Inference, Ephemeroptera, Long-branch attraction, Mayfly,  
43 Mitochondrial genomics, Odonata, Palaeoptera problem, Polyneoptera, Pterygota, Rogue taxa

## 44 **Background**

45 Insects are the most diverse branch of metazoan life, yet the relationships among the basal branches  
46 of the winged insects (Pterygota) remains one of the major open questions in the evolution of life.  
47 The unresolved relationship of the basal orders Odonata (dragon- and damselflies) and  
48 Ephemeroptera (mayflies) to the Neoptera (i.e., to the rest of the Pterygota) has been termed the  
49 “Palaeoptera problem” [1,2]. The name Paleoptera (“old wings”) reflects the inability of the  
50 Ephemeroptera and Odonata to fold their wings flat over the abdomen. This has long been  
51 considered to be the ancestral condition, in contrast to the more derived Neoptera (“new wings”)  
52 (reviewed by Trautwein et al. [3]). The monophyly of the Neoptera, including the three major  
53 lineages Polyneoptera, Paraneoptera, and Holometabola, is widely accepted, although relationships  
54 among polyneopteran lineages [4] and the monophyly of the Paraneoptera [5] remain unresolved.

55 There are three competing hypotheses relating to the Palaeoptera problem: the Palaeoptera  
56 hypothesis ((Ephemeroptera + Odonata) + Neoptera), the basal Ephemeroptera hypothesis  
57 (Ephemeroptera + (Odonata + Neoptera)), and the basal Odonata hypothesis (Odonata +  
58 (Ephemeroptera + Neoptera)) [3,6,7]. All hypotheses are supported by morphological as well as  
59 molecular data to varying degrees (reviewed by Trautwein et al. [3]). Different authors, using the  
60 same set of genes and taxa set but different phylogenetic approaches, namely Bayesian inference  
61 (BI) vs. maximum likelihood (ML) [2,8,9], and nucleotide vs. amino acid (aa) sequences [10]  
62 obtained results supporting distinct hypotheses. The Palaeoptera hypothesis has received support  
63 from several molecular studies based on rRNA genes and nuclear DNA [5,11-13], and from nDNA  
64 phylogenomic analyses [9,14,15]. Thomas et al. [12] and Kjer et al. [11] included the most  
65 comprehensive taxon sampling with 35, respectively seven species from each of the three lineages  
66 (i.e., Ephemeroptera, Odonata, Neoptera) analyzing seven, respectively eight genes (rRNAs, nuclear  
67 DNA (nDNA), mitochondrial DNA (mtDNA)). The basal Ephemeroptera hypothesis was supported  
68 by previous studies using mitochondrial genome data [10,16,17], and a combined analysis of rRNA

69 and one nuclear gene [2]. Other studies have concluded the relationships are ambiguous [2]. Notably,  
70 studies supporting the basal Ephemeroptera hypothesis have included either a limited number of  
71 mayfly species (e.g., one [17,18], two [16,19], four [20], or five [10] species) or a limited number of  
72 unlinked loci (e.g., one [10,16,17,20], two [18,19,21], or three [2]). The basal Odonata hypothesis  
73 has received support from previous studies based on mitochondrial genome data [22,23], rRNA  
74 genes [8,24-27], combining rRNA and nDNA [28], and phylogenomic nDNA [9,29]. These studies,  
75 with the exceptions of few studies based on *18S* rRNA [24,25,27], included in total between two  
76 [8,29] and 13 species [26] from the orders Ephemeroptera and Odonata.

77 The conflicting phylogenetic signals may result from the ancient radiation of the lineages  
78 Ephemeroptera, Odonata, and Neoptera from a common ancestor in the distant past [4]. These three  
79 ancient lineages appear to have diverged rapidly, leaving few characteristics to determine their  
80 phylogenetic relationships [4]. Evolutionary rate heterogeneity across clades and the representation  
81 of old clades by recent extant taxa make ancient relationships such as those of early winged insects  
82 the most difficult challenges for phylogenetics [4,7]. Given the weak phylogenetic signal,  
83 reconstructions are more susceptible to systematic errors [4,12,30-32]. Other sources of conflicting  
84 signal in studies of the relationships among these three lineages may result from differences in taxon  
85 sampling, sequence data, alignment methods, and phylogenetic methods used including models of  
86 evolution [3,12,33]. The use of mitochondrial protein-coding genes (PCGs) derived from  
87 mitochondrial genomes can circumvent some of these difficulties, since they are easier to align and  
88 also appropriate models of molecular evolution are well established [34-36]. On the other hand,  
89 mitochondrial genes include several drawbacks, most importantly the possible presence of  
90 pseudogenes [37-39]. However, data derived from high-throughput sequencing, depending on the  
91 coverage bears the potential to distinguish between functional genes and pseudogenes based on  
92 higher mutation rates of the later [40].

93 Overall, mitochondrial markers are well studied and therefore the most widely employed genetic  
94 markers in insects, being considered a promising “instrument” for insect systematics [41]. Insect  
95 mitochondrial genomes are highly conserved, ranging from 15 to 18 kb in length, containing 37  
96 genes: 13 PCGs, two ribosomal RNAs (rRNAs, *rrnL* and *rrnS*), and 22 transfer RNAs (tRNAs, *trn\**)  
97 [42]. A non-coding region of variable length, thought to be the origin of initiation of transcription  
98 and replication, is typically present [43,44] and referred to as the AT-rich region. The typical  
99 ancestral insect mitochondrial genome differs from the ancestral arthropod mitochondrial genome  
100 only by the location of *trnL* [45]. Significant differences in structure, gene content, and gene  
101 arrangement have been found to be the exception for highly derived taxa.

102 Importantly there is still an unbalance in the numbers of available molecular markers between the  
103 different insect lineages. In particular the early winged insects (i.e., Ephemeroptera and Odonata) are  
104 relatively under-represented. This is (partly) because so far most genomic data were obtained for  
105 insect orders that are of economical interest (e.g., as pollinators, model species, agricultural pests,  
106 and vectors of human diseases, [46]). As of January 2017, there were 39 complete or nearly complete  
107 palaeopteran mitochondrial genomes (Ephemeroptera: 18, Odonata: 21) from 22 families (eleven of  
108 each) available on GenBank; 22 of which were included in publications (Ephemeroptera: ten,  
109 Odonata: twelve). Compared to the number of families that have been described (Ephemeroptera: 42  
110 [47], Odonata: 30 [48]) this is still a relatively low number.

111 The insect order Ephemeroptera comprises over 3,000 species, comprising as the two most  
112 species rich families the Baetidae (833 species) and the Leptophlebiidae (608 species) [47]. Their  
113 biogeographic origin is probably Pangean, including a greater diversity and higher endemism rate in  
114 the Neotropics and Australasia for the Baetidae, and the Neotropical and Afrotropical regions for the  
115 Leptophlebiidae, respectively [47].

116 We investigated the relationships of the oldest extant winged insects and newly sequenced three  
117 mayfly mitochondrial genomes to improve sampling of this under-represented order. New taxa

118 included one representative of the family Leptophlebiidae, for which no mitochondrial genome data  
119 were available, and two representatives of the Baetidae, one from each subfamily. We used BI and  
120 ML approaches and created matrices that eliminated taxa that reduced overall tree support (rogue  
121 taxa) and that were affected by long-branch attraction (LBA). Our analysis included 29 palaeopteran  
122 mitochondrial genomes from 20 families and 64 other insect mitochondrial genomes. We expect the  
123 increased taxon sampling to improve the phylogenetic signal of the basal nodes and add support for  
124 one of the three competing hypotheses.

## 125 **Methods**

### 126 **Taxon sampling**

127 We newly sequenced three mitochondrial genomes of the two most diverse Ephemeroptera families.  
128 *Habrophlebiodes zijinensis* GUI, ZHANG & WU, 1996 is the first representative of the family  
129 Leptophlebiidae to have its complete mitochondrial genome sequenced. *Baetis rutilocylindratus*  
130 WANG, QIN, CHEN & ZHOU, 2011 and *Cloeon dipterum* L. 1761 are both members of the Baetidae  
131 and representative each subfamily: *B. rutilocylindratus* from Baetinae, and *C. dipterum* from  
132 Cloeninae. There was a mitochondrial genome from one other member of the Baetinae available on  
133 GenBank prior to our study (*Alainites yixiani*, GQ502451, Jia & Zhou). Our analysis also included  
134 four species from Archaeognatha, three from Zygentoma (formerly Thysanura), ten from Odonata,  
135 16 additional species from Ephemeroptera, four from Plecoptera, four from Ensifera of Orthoptera,  
136 nine from Caelifera of Orthoptera, 13 from Phasmatodea, two from Mantodea, six from Blattodea, 13  
137 from Isoptera, and one each from Collembola, Dermaptera, Grylloblattodea, and Mantophasmatodea  
138 (Table 1). Amino acid sequences were obtained from GenBank using a custom Python script  
139 (mitogenome\_ncbi.py, [https://github.com/srutschmann/python\\_scripts](https://github.com/srutschmann/python_scripts)).

140

141 [Table 1 should be added here]

142

## 143 Sequencing and assembly

144 The three mayfly species were sequenced with either 454/FLX pyrosequencing (*C. dipterum*) or  
145 Sanger sequencing (*B. rutilocylindratus* and *H. zijinensis*). We extracted DNA from *C. dipterum* from  
146 twelve to twenty pooled reared subimago specimens, prepared a shotgun library, and sequenced four  
147 lanes on a Roche (454) *GS FLX* machine at the Berlin Center for Genomics in Biodiversity Research  
148 (BeGenDiv, Berlin, Germany) (see also [49]). The obtained sequence reads were trimmed and *de*  
149 *novo* assembled using the software Newbler v.2.5.3 (454 Life Science Cooperation) under default  
150 settings for large data sets. In order to extract the mitochondrial genome of *C. dipterum*, we  
151 performed BLASTN searches [50] using as query all assembled contigs against the NCBI database.  
152 We mapped all matching reads back to the mitochondrial genome with BWA [51], using the BWA-  
153 SW algorithm [52] with settings suggested for 454 data by CORAL (match score = 2, mismatch  
154 penalty = 2, and gap open penalty = 3, [53]).

155 Specimens of *B. rutilocylindratus* and *H. zijinensis* were collected in Zijin Hill, Nanjing, China.  
156 The DNA was extracted from between two and four larvae using the DNeasy® Blood & Tissue  
157 (Qiagen, Leipzig, Germany) kit. Four DNA fragments of each species were amplified with universal  
158 primers (*B. rutilocylindratus*: *cob*, *cox1*, *cox3*, *rrnL*; *H. zijinensis*: *cob*, *cox1*, *nad4*, *rrnL*, [54]).  
159 Subsequently, based on the previously obtained sequence information we designed six (*B.*  
160 *rutilocylindratus*) respective four (*H. zijinensis*) specific primer pairs (Additional file 1: Table S1;  
161 see also Li et al. [55]). Standard and long polymerase chain reactions (PCRs) were performed on a  
162 DNA Engine Peltier Thermal Cycler (Bio-Rad, Shanghai, China). Therefore, we used the rTaq™  
163 DNA polymerase (TaKaRa Bio, Dalian, China) for fragments smaller than two kb and the LA Taq™  
164 polymerase (TaKaRa Bio, Dalian, China) for fragments larger than two kb. All PCR products were  
165 purified with the Axygen agarose-out kit. When the PCR amplification signal was too weak to  
166 sequence or sequencing resulted in overlap peaks, the products were ligated to pGEM®-T Easy  
167 Vector (Promega, Southampton, UK) by *Escherichia coli*, and each resulting clone was sequenced.

168 All purified amplification products were sequenced successively in both directions on an ABI3130xl  
169 capillary sequencer. Forward and reverse sequences were assembled and edited using CodonCode  
170 Aligner v.3.5.6 (CodonCode Corporation).

### 171 **Sequence alignments and data matrices**

172 We prepared two data matrices of aa sequences based on the annotated mitochondrial genomes (see  
173 below), including a set with all 93 taxa (all\_taxa matrix), and a matrix for which we removed taxa  
174 that were either identified as rogue taxa using the RogueNaRok algorithm [56,57] and showing LBA  
175 [58,59] (optimized\_taxa matrix; 88 taxa, see Table 1). We used GUIDANCE2 [60,61] to align the  
176 sequences, and identify and remove positions detected as ambiguously aligned regions. To run  
177 GUIDANCE we applied the default settings, using as multiple sequences alignment program  
178 MAFFT v.7.050b (L-INS-I algorithm with default settings, [62]).

179 The best-fitting partitioning schemes and corresponding aa substitution models were estimated  
180 with PartitionFinder v.2 (<https://github.com/brettc/partitionfinder>, [63]). We used the Bayesian  
181 Information Criterion (BIC) to choose the best model, linked branch lengths, and a greedy search  
182 [63] with RAxML v.8.2.8 [64]. Thereby each gene was defined as one data block (i.e., possible  
183 partition).

184 To identify rogue taxa, we applied the RogueNaRok algorithm [56,57]. We used the bootstrap  
185 replicates and the best supported maximum likelihood tree based on the all\_taxa matrix (see below).  
186 Identified rogue taxa were removed from the all\_taxa matrix, resulting in the optimized\_taxa matrix  
187 (Table 1). Taxa showing evidence of LBA *sensu* Bergsten [65] were identified using heterogeneities  
188 in sequence divergence based on a model of evolution derived from the entire data matrix. For this,  
189 the Relative Composition Frequency Variability (RCFV) values of each species were calculated with  
190 BaCoCa [66] using the partitioned concatenated data matrix (i.e., all\_taxa matrix). Taxa with the  
191 highest values were excluded in the optimized\_taxa matrix, apart from the Ephemeroptera, which  
192 were retained because they are the focus of our study and their monophyly is well-established [1,2].



## 193 **Phylogenetic reconstruction**

194 Phylogenetic reconstructions were carried out using MrBayes v.3.2.4 [67], and RAxML v.8.1.7 [64].  
195 We analyzed both matrices (all\_taxa, optimized\_taxa) using the best-fitting partitioning scheme and  
196 model for each (see Table 2). For BI, we unlinked the frequencies, gamma distributions, substitution  
197 rates and the proportion of invariant sites across partitions. For each matrix, we run two independent  
198 analyses of four MCMC chains with  $10^7$  generations, sampling every  $10^3$  generations and discarding  
199 a burn-in of 25%. Maximum likelihood inferences were performed with 200 bootstrap replicates.  
200 Trees reconstructed from the all\_taxa matrix were rooted with *Tetrodontophora bielanensis*  
201 (Collembola). Trees reconstructed from the optimized\_taxa matrix were rooted with *Nesomachilis*  
202 *australica* (Archaeognatha, according to Song et al. [10]) because *Tetrodontophora bielanensis* was  
203 found to be a rogue taxon (see Results). All trees were visualized with the ape v.4.1 [68], phangorn  
204 v.2.1.1 [69], and ggtree v.1.4.20 [70] packages for R v.3 [71].

## 205 **Annotation and characterization**

206 All mitochondrial genomes were annotated using the MITOS webserver ([http://mitos.bioinf.uni-](http://mitos.bioinf.uni-leipzig.de/index.py)  
207 [leipzig.de/index.py](http://mitos.bioinf.uni-leipzig.de/index.py), [72]), DOGMA [73], and MFannot ([http://megasun.bch.umontreal.ca/cgi-](http://megasun.bch.umontreal.ca/cgi-bin/mfannot/mfannotInterface.pl)  
208 [bin/mfannot/mfannotInterface.pl](http://megasun.bch.umontreal.ca/cgi-bin/mfannot/mfannotInterface.pl)). The predicted PCGs were checked for stop codons and manually  
209 adjusted by comparison with the longest predicted open reading frames as implemented in Geneious  
210 R7 v.7.1.3 (Biomatters Ltd.), and by comparison with the respective homologous insect sequence  
211 alignment. For the tRNA prediction, we additionally used ARWEN v.1.2.3 [74] and tRNAscan-SE  
212 v.1.21 (<http://lowelab.ucsc.edu/tRNAscan-SE/>, [75]). The annotated mitochondrial genomes were  
213 visualized with OrganellarGenomeDRAW (<http://ogdraw.mpimp-golm.mpg.de/cgi-bin/ogdraw.pl>,  
214 [76]) and manually edited.

215 Nucleotide contents were retrieved using Geneious. To correct biases in the AT content due to  
216 incomplete mitochondrial genomes mostly missing the AT-rich region, we removed all AT-rich  
217 regions and the two rRNAs including the five close-by tRNAs (*trnL1-trnM*) and recalculated the

218 nucleotide base pair (bp) compositions. The AT and GC composition skewness were calculated as  
 219 follows: AT-skew =  $(A - T) / (A + T)$ , and GC-skew =  $(G - C) / (G + C)$  [77].

## 220 Results

### 221 **Data matrices**

222 The final matrices had lengths of 3,675 aa (all\_taxa matrix, including 93 taxa) and 3,673 aa  
 223 (optimized\_taxa matrix, including 88 taxa, see Table 1). As best-fitting partitioning scheme for the  
 224 two matrices, we identified either five partitions (all\_taxa matrix, Table 2) or four partitions  
 225 (optimized\_taxa, Table 2). As best-fitting models of aa sequence evolution, we identified MtZoa [78]  
 226 and MtArt [35].

227  
 228 **Table 2** Overview of data matrices, including the best-fitting partitioning and model schemes, and  
 229 amino acid (aa) sequence length

| Matrix                                           | Model                    | Length [aa] |
|--------------------------------------------------|--------------------------|-------------|
| <u>all_taxa</u>                                  |                          |             |
| partition_1: <i>atp6, atp8, nad2, nad3, nad6</i> | MTZOA + $\Gamma$ + I + F | 840         |
| partition_2: <i>cox1</i>                         | MTZOA + $\Gamma$ + I     | 528         |
| partition_3: <i>cob, cox2</i>                    | MTZOA + $\Gamma$ + I + F | 608         |
| partition_4: <i>cox3</i>                         | MTART + $\Gamma$ + I     | 268         |
| partition_5: <i>nad1, nad4, nad4L, nad5</i>      | MTZOA + $\Gamma$ + I + F | 1431        |
| <u>optimized_taxa</u>                            |                          |             |
| partition_1: <i>atp6, atp8, nad2, nad3, nad6</i> | MTZOA + $\Gamma$ + I + F | 843         |
| partition_2: <i>cox1</i>                         | MTZOA + $\Gamma$ + I     | 529         |
| partition_3: <i>cob, cox2, cox3</i>              | MTZOA + $\Gamma$ + I + F | 878         |
| partition_4: <i>nad1, nad4, nad4L, nad5</i>      | MTZOA + $\Gamma$ + I + F | 1423        |

230  
 231 The RogueNaRok analysis identified the outgroup *T. bielanensis* as well as *Gryllotalpa orientalis*  
 232 (Orthoptera) and *Phraortes* sp. (Phasmatodea) as taxa with uncertain phylogenetic positions, leading  
 233 to less accurate phylogenetic reconstructions. *G. orientalis* (Orthoptera) and *Phraortes* sp.

234 (Phasmatodea) clustered within the corresponding order using the all\_taxa matrix, although the  
235 nodes containing these species were not supported by ML. In the test for LBA, *Aposthonia japonica*  
236 (Embioptera) and *Challia fletcheri* (Dermaptera) had high RCFV values (0.0237 and 0.0307,  
237 respectively) suggesting they were affected by LBA. Both species clustered within other orders:  
238 *Challia fletcheri* (Dermaptera) within the Ephemeroptera as sister taxon to a clade containing all  
239 representatives of the family Baetidae, and *A. japonica* (Embioptera) within the Phasmatodea as  
240 sister taxon to a clade containing all species of the order with the exception of *T. californicum* (Table  
241 3, Additional file 2: Figure S1). The mayflies Teloganodidae sp. (0.0305) and the three baetids *A.*  
242 *yixiani* (0.0235), *B. rutilocylindratus* (0.0232), and *C. dipterum* (0.0201) showed relatively high  
243 RCFV values.

#### 244 **Phylogenetic reconstruction**

245 The Bayesian reconstruction based on the optimized\_taxa matrix produced the tree with most  
246 support compared to ML or to either analysis of the all\_taxa matrix (Figure 1, Table 3, Additional  
247 files 2-4: Figures S1-S3). The basal Odonata hypothesis was highly supported in this tree (Bayesian  
248 posterior probability (BPP) = 1.00), whereas neither the basal Ephemeroptera hypothesis nor the  
249 Palaeoptera hypothesis received support in any analysis (Table 3). The Odonata were monophyletic  
250 in all analyses (BPP = 1.00, BS = 100%) whereas the Ephemeroptera were monophyletic only using  
251 the optimized\_taxa matrix (Figure 1, Table 3, Additional file 3: Figures S2).

252

253 **Table 3** Support for the three hypotheses and node support for clades of interest. Node support is  
254 based on Bayesian inference (BI) and maximum likelihood (ML) analyses of two data matrices:  
255 optimized\_taxa and all\_taxa, whereby optimized\_taxa had 5 terminal nodes removed based on the  
256 occurrence of rogue taxa and long branch attraction. Asterices indicate hypothesis/node support (\*\*  
257 = Bayesian posterior probability (BPP)  $\geq$  0.95 and Bootstrap support (BS) = 90%) \* = BPP  $\geq$  0.90

258 and BS  $\geq$  80%). Superorders are underlined, and suborders are italicised. Letters in brackets refer to  
 259 monophyletic clades in the Figure 1

| Hypothesis/Clade             | BI             |          | ML             |          |
|------------------------------|----------------|----------|----------------|----------|
|                              | optimized_taxa | all_taxa | optimized_taxa | all_taxa |
| Palaeoptera hypothesis       |                |          |                |          |
| Ephemeroptera hypothesis     |                |          |                |          |
| Odonata hypothesis           | **             |          |                |          |
| Winged insects (A)           | **             |          |                |          |
| <u>Palaeoptera</u>           |                |          |                |          |
| Odonata (B)                  | **             | **       | **             | **       |
| Ephemeroptera (C)            | **             |          | **             |          |
| <u>Polyneoptera</u>          |                |          | *              |          |
| Plecoptera (D)               | **             | **       | **             | **       |
| Orthoptera                   |                |          |                |          |
| <i>Ensifera</i> (E)          | **             | **       | **             |          |
| <i>Caelifera</i> (F)         | **             | **       | **             | **       |
| Phasmatodea <sup>a</sup> (G) | **             | **       | **             | **       |
| <u>Dictyoptera</u> (H)       | **             | **       | **             | **       |
| Mantodea (I)                 | **             | **       | **             | **       |
| Isoptera (J)                 | **             | **       | **             | **       |

260 <sup>a</sup>, Includes *Aposthonia japonica* (Embioptera) in reconstructions using the all\_taxa matrix.

261

262 Most other nodes of interest were consistently supported across different matrices and analyses  
 263 (Table 3). The Polyneoptera were moderately supported (BS  $\geq$  80%) for the optimized\_taxa matrix  
 264 using the ML. Within the Polyneoptera, all orders except Orthoptera and Blattodea were  
 265 monophyletic (BPP  $\geq$  0.95, and BS  $\geq$  90%, Table 3). The two Orthoptera suborders Ensifera and  
 266 Caelifera were monophyletic (Table 3), whereby the Ensifera clustered together with the Plecoptera  
 267 for the optimized\_taxa matrix using both ML and BI. The Grylloblattodea, Mantophasmatodea, and  
 268 Phasmatodea were all well supported using the optimized\_taxa matrix. For the all\_taxa matrix also  
 269 the Embioptera were recovered in this clade as sister taxa to the Phasmatodea excluding *Timema*

270 *californicum* (Figure 1, Additional files 2, 4: Figures S1, S3). The superorder Dictyoptera was  
271 monophyletic clade, consisting of the monophyletic Mantodea and the Blattodea including the  
272 Isoptera.

### 273 **Mitochondrial genomes**

274 The mitochondrial genome sequences have been deposited at GenBank with the accession numbers  
275 XXXXXXXXX, XXXXXXXXX, and XXXXXXXXX. The pyrosequencing run of *C. dipterum* using the  
276 454 GS FLX system resulted in 651,306 reads, of which 1.14% mapped to the assembled  
277 mitochondrial genome. The depth of coverage for the *C. dipterum* mitochondrial genome was 249.2x  
278 ( $\pm$  80.6 SD, Figure 2a). The three mayfly mitochondrial genomes were 15,407 bp (*C. dipterum*),  
279 14,883 bp (*B. rutilocylindratus*), and 14,355 bp (*H. zijinensis*) long (Table 4). For *B.*  
280 *rutilocylindratus*, the complete mitochondrial genome was sequenced (Figure 2b). The AT-rich  
281 regions were incomplete for genomes of *C. dipterum* and *H. zijinensis*. The three tRNAs between the  
282 AT-rich region and *nad2* were also missing in *H. zijinensis* due to the incomplete sequencing (Figure  
283 2c). All three sequenced mitochondrial genomes contained the entire set of 13 PCGs, two rRNAs,  
284 and either 22 tRNAs (*B. rutilocylindratus*, *C. dipterum*) or 19 for the incomplete mitochondrial  
285 genome of *H. zijinensis*, including 23 coded at the (+) strand (21 for *H. zijinensis*) and 14 at the (-)  
286 strand (13 for *H. zijinensis*) (Figure 2).

287 The order of the genes was conserved, with the exceptions of the two inverted tRNAs Arginine  
288 and Alanine for *H. zijinensis* (Figure 2c). All PCGs started with the ATN codons (ATT, ATG, ATA),  
289 and mostly ended with the complete termination codon (TAA or TAG). Exceptions were an  
290 incomplete T termination codon for *nad4* in *B. rutilocylindratus* and *cox1* started with CTC in *C.*  
291 *dipterum*. The AT content of the mitochondrial genomes that were corrected for the missing regions,  
292 was lowest in *B. rutilocylindratus* (59.9%, Table 4, Additional file 5: Table S2). The mean AT  
293 content for all available mayfly mitochondrial genomes was 65.34%. The average AT-skew was -  
294 0.03 ( $\pm$  0.04 SD) and the average GC-skew was -0.13 ( $\pm$  0.14 SD).

295

296 **Table 4** Overview of sequenced ephemeropteran mitochondrial genomes. Total sequence length in  
297 base pairs (bp) and individual nucleotide compositions of mayfly mitochondrial genomes calculated  
298 based on the whole available sequences and the ones corrected for the incomplete mitochondrial  
299 genomes (see Methods; for the complete list of all ephemeropteran mitochondrial genomes see  
300 Additional file 5: Table S2)

| Family          | Species                  | Length<br>[bp]      | A%   | C%   | G%   | T%   | GC%  | AT%  |
|-----------------|--------------------------|---------------------|------|------|------|------|------|------|
| Baetidae        | <i>Baetis</i>            | 14,883 <sup>a</sup> | 27.3 | 19.8 | 20.1 | 32.8 | 39.9 | 60.1 |
|                 | <i>rutilocylindratus</i> | 12,234              | 26.7 | 19.8 | 20.4 | 33.2 | 40.2 | 59.9 |
| Baetidae        | <i>Cloeon dipterum</i>   | 14,355              | 30.6 | 14.7 | 16.3 | 38.4 | 30.9 | 69.0 |
|                 |                          | 12,197              | 29.9 | 14.5 | 16.9 | 38.7 | 31.4 | 68.6 |
| Leptophlebiidae | <i>Habrophlebiodes</i>   | 15,407              | 33.8 | 20.2 | 11.0 | 35.1 | 31.2 | 68.9 |
|                 | <i>zijinensis</i>        | 12,417              | 33.6 | 20.6 | 11.5 | 34.3 | 32.1 | 67.9 |

301 <sup>a</sup>, Indicates complete mitochondrial genomes; rest are incomplete mitochondrial genomes.

302

## 303 **Discussion**

### 304 **Phylogenetic relationships of Palaeoptera**

305 Our Bayesian reconstruction based on the optimized\_taxa matrix provided strong support for the  
306 basal Odonata hypothesis. Previous work based on mitochondrial genome data is (partially)  
307 congruent with our findings [10,22,23]. In contrast to our results, a handful of studies based on  
308 nucleotide and aa sequences of mitochondrial PCGs and mitochondrial RNA (mtRNAs) found  
309 overall strong support for the basal Ephemeroptera hypothesis [10,16,17,20]. Interestingly, Song et  
310 al. [10], supporting overall the Ephemeroptera hypothesis, found evidence for the Odonata  
311 hypothesis when using aa sequence data. Our results confirm the trend towards a better support for  
312 the ancestral position of the Odonata when using an increased mayfly taxon sampling (more than ten  
313 species per lineage) [24,25,27]. The exceptions for this are the work by Ogden and Whiting [2] and

314 Thomas et al. [12], that overall support the Ephemeroptera respective Palaeoptera hypothesis but  
315 contain some data sets in favor of the Odonata hypothesis. Early inconsistencies based on different  
316 sequence alignment strategies [2] appear to become less relevant due to the advances of multiple  
317 sequence alignment programs. Overall, the vast majority of studies were based on BI and ML.  
318 Thomas et al. [12] recovered increased resolution using BI in comparison to ML. Different data  
319 partitioning (i.e., gene trees resulting in different tree topologies) by Kjer et al. [11] supported  
320 different hypotheses for different genes. Evidently, using rRNAs (nDNA and mtDNA) and the  
321 nDNA EF1- $\alpha$  the Odonata hypothesis was recovered whereas the analyses based on the combined  
322 and on the mtDNA data matrix resulted in a monophyletic palaeopteran clade. It is questionable  
323 whether an increase in analyzed genomic data (i.e., phylogenomic studies) will be able to resolve the  
324 Palaeoptera problem. Notably, Misof et al. [79] and Regier et al. [15], using 1,478 PCGs and seven  
325 palaeopteran species, respective 62 PCGs and four palaeoptera species, recovered the Ephemeroptera  
326 and Odonata as sister clades (i.e., the Palaeoptera hypothesis) but without high support values.  
327 Overall, more knowledge about the use and limitation of individual markers are needed. For example  
328 Simon et al. [80] found that proteins involved in cellular processes and signaling harbor the most  
329 phylogenetic signal.

330 The increased mayfly taxon sampling highlighted the phylogenetic diversity (as indicated by the  
331 branch lengths of the tip taxa, Figure 1, Additional files 2-4: Figures S1-S3) of the Palaeoptera. The  
332 overall long-branch lengths and high rate-heterogeneity across sites might be one of the explanations  
333 for the “Palaeoptera problem”. Especially the family of the Baetidae, which was long thought to be  
334 the most ancestral mayfly family [81], showed high base composition heterogeneity possibly  
335 evidencing LBA. However, in agreement with other more recent studies we also recovered *S.*  
336 *chinensis* as sister taxa to all other mayflies [55,82]. It remains to be resolved whether an increased  
337 taxon sampling may obviate LBA *sensu* Bergsten [65].

### 338 **Phylogenetic relationships of Polyneoptera**

339 Besides the Palaeoptera, a universal consensus on the placement of the Plecoptera, Dermaptera,  
340 Embioptera, and Xenoptera (i.e., Grylloblattodea and Mantophasmatodea) remains elusive [10]. The  
341 monophyly of the Polyneoptera has become more widely accepted [5,10,23,79,83,84], although  
342 several studies and data matrices do not support their monophyly [10,11,80]. This is also reflected by  
343 our results, recovering the Polyneoptera as moderately supported monophyletic clade when using the  
344 optimized\_taxa matrix with ML. The placement of the order Plecoptera also remains elusive. The  
345 order often clusters among the more ancestral polyneopteran orders [10,23,79] and in a close  
346 relationship to the Dermaptera, although earlier studies using few species and the aa sequences of the  
347 mitochondrial PCGs also recovered a sister relationship to the Ephemeroptera [22,85]. Notably, Song  
348 et al. [10] was the only study including four dermapteran species. The monophyly of the Orthoptera  
349 has been established by previous studies based on mitochondrial genome data and a large number of  
350 PCGs [10,79,86,87]. However, in a recent study, the Ensifera also clustered as more ancestral clade  
351 [10]. As for this study, Song et al. [10] also used BI and ML based on mitochondrial genome data.  
352 Notably, Song et al. [10] explain the more ancestral position of Ensifera by more similar sequence  
353 compositional bias in comparison to the outgroups. The relationship between Grylloblattodea and  
354 Mantophasmatodea (i.e., Xenoptera superorder) remains elusive. Mostly this is due to the limited  
355 amount of available molecular data, including ordinal-level phylogenies based on two [5,10] or three  
356 xenopteran species [79]. Using mitochondrial genome data and one species per order, also Song et al.  
357 [10] did not recover them as a monophyletic clade. Their monophyly was supported by previous  
358 studies using one Mantophasmatodea and one Grylloblattodea species [5], respective one  
359 Mantophasmatodea and two Grylloblattodea species [79]). The Phasmatodea have also been found in  
360 previous studies as paraphyletic clade due to the outside position of *T. californicum* [10,16]. In  
361 contrast, Misof et al. [79], using a large set of nuclear PCGs also found *Timema* as the sister species  
362 to all other representatives of the order. The monophyly of the superorder Dictyoptera is generally



363 accepted and the hierarchical clustering (Mantodea + (Blattodea + Isoptera)) has been well supported  
364 [5,10,11,16,23,79,88,89] using nucleotide and aa sequences of both mtDNA and nDNA.

### 365 **Optimizing data matrix**

366 The optimization of the data matrix overall resulted in a better-supported tree (as measured by the  
367 total number of supported nodes and the fact that all nodes supported in the all\_taxa matrix were also  
368 recovered in the optimized\_taxa matrix). In a study on butterfly phylogenetics, the authors also  
369 removed rogue taxa and found dramatically increased bootstrap support values [90]. Comparing the  
370 number of supported nodes from the BI and ML approach, the former always resulted in more  
371 resolved nodes. This result is consistent with previous work on the “Palaeoptera problem”,  
372 recovering more support for analyses using BI [12]. Generally, the choice of the outgroup species  
373 was reported as being crucial for resolving problematic splits in the tree of life such as insects origin  
374 [12]. Thus, finding the outgroup as a rogue taxon was perhaps not surprising. The close phylogenetic  
375 relationship of the Dermaptera and Ephemeroptera (Additional files 2, 4: Figures S1, S3) might be  
376 misleading due to LBA. Li et al. [55] also found the order Dermaptera as being closely related to the  
377 mayflies. On the other hand studies based on phylogenomic data reported the Dermaptera as sister  
378 taxa to the orders Plecoptera [5,16,23,80,91] Zoraptera [28,79]. Using mitochondrial genome data  
379 and an increased taxon sampling (i.e., four dermapteran species), Song et al. [10] found the  
380 Dermaptera and/or Plecoptera being sister to the remaining taxa within Polyneoptera. Notably, when  
381 only using one species of Dermaptera, *C. fletcheri* emerged as sister taxa to the Ephemeroptera [10].  
382 This result in agreement with our findings is presumably due to LBA. Phylogenomic data matrices  
383 (e.g., expressed sequence tags data: [83], 1,478 PCGs: [79]) and nuclear genes [5] found the  
384 Embioptera to be sister clade to the Phasmatodea. Using mitochondrial genomes data and BI, the  
385 Embioptera were also found as sister group to the Phasmatodea (excluding *T. californicum*) [10].  
386 However, in the same study, they also found support for the sister-relationship of Embioptera-  
387 Zoraptera using ML [10]. Overall, more phylogenetic studies will be needed to clarify this issue;

388 mostly also because the use of few taxa from anomalous orders (i.e., Dermaptera and Embioptera)  
389 tend to evoke LBA [10].

### 390 **Characterization of ephemeropteran mitochondrial genomes**

391 Mayfly mitochondrial genomes are widely conserved in gene content and nucleotide composition  
392 across eleven families, with only a few differences in the content of their tRNAs. The coverage of  
393 the *Cloeon*-mitochondrial genome was in agreement with other studies, using the same sequencing  
394 platform (e.g., 59-281x, [92]). The missing of part of the AT-rich region is due to reduced  
395 sequencing and assembly efficiency of this low complexity region and common among insect  
396 mitochondrial genomes [55,93]. The gene order and orientation were with the exception of two  
397 shifted tRNAs for *H. zijinensis* identical to the ancestral insect mitochondrial genome [41,42,54].  
398 Other mayflies are also reported to miss complete T termination codons in the genes *cox2* and *nad5*  
399 [55,93,94]. The two rRNAs were located between *trnL* and *trnV* (*rrnL*), and between *trnV* and the  
400 AT-rich region (*rrnS*), respectively. All ephemeropteran mitochondrial genomes contain an AT-rich  
401 region, which is placed between the *rrnS* (- strand) and *trnI* (+ strand). Li et al. [55] reported two  
402 distinct parts within the AT-rich region in *Siphuriscus chinensis*, which also seems to be present in  
403 *C. dipterum*. Therein, they described the so called CR<sub>1</sub>, which is located close to the *rrnS* and has a  
404 high AT content (71.6%), including six identical 140 bp sequences, and the CR<sub>2</sub>, which is close to  
405 the *trnI* and has a lower AT content (58.1%). *E. orientalis* contains two identical 55 bp long  
406 sequences in the AT-rich region [94]. Few mayfly mitochondrial genomes differ in their gene  
407 content from the ancestral insect mitochondrial genome, possessing one additional tRNA. The two  
408 heptageniid species *Parafronurus youi* and *Epeorus* sp. encode a second copy of the *trnM* (AUG,  
409 *trnM2*) gene located between *trnI* and *trnQ* [17,93]. For *S. chinensis*, an additional *trnK2* (AAA)  
410 gene is described [55]. Overall, Song et al. [10] found similar genetic distances for the early  
411 branching insects lineages. The AT contents for the Ephemeroptera were very similar to the ones of  
412 Odonata (62.6%-68.5% for *coxI*, [95]).

413 **Conclusions**

414 Our analysis based on an increased mayfly taxon sampling and data matrix optimization supported  
415 the Odonata hypothesis and unravelled fine structural changes within the palaeopteran mitochondrial  
416 genomes. While both BI and ML overall resulted in highly supported trees, only the BI based on an  
417 optimized taxa matrix highly supported the sister-relationship of the Ephemeroptera and Neoptera.  
418 The optimized taxa matrix, excluding rogue taxa and taxa with LBA, resulted in an overall better  
419 supported tree (as measured by the number of supported nodes) for both BI and ML. Our findings  
420 highlight the essential need to increase the taxon sampling of under-represented lineages (such as the  
421 Palaeoptera) in order to resolve their phylogenetic position. Here we demonstrated the need for an  
422 increased taxon sampling in combination with data matrix optimization, and the use of different  
423 phylogenetic approaches in order to resolve an ancient radiation. Establishing general  
424 recommendation for data matrix optimization requires additional analyses on a broader range of  
425 lineages.

426

427

428 **Declarations**

429 **Ethics approval and consent to participate**

430 Not applicable.

431 **Consent for publication**

432 Not applicable.

433 **Availability of data and material**

434 Newly generated sequences are available on GenBank (XXXXXXXX, XXXXXXXX, and  
435 XXXXXXXX).

436 **Competing interests**

437 The authors declare that they have no competing interests.

438 **Funding**

439 Research was funded by the Leibniz Association PAKT für Forschung und Innovation ('FREDIE'  
440 project: SAW-2011-ZFMK-3).

441 **Authors' contributions**

442 SR and MTM conceived the study; SR sequenced and analyzed the *Cloeon dipterum* genome, and  
443 performed all combined analyses; PC and CZ obtained and analyzed the *Baetis rutilocylindratus* and  
444 *Habrophlebiodes zijinensis* genomes; SR and MTM wrote the manuscript. All authors made  
445 contributions to subsequent revisions and agreed to the final version.

446 **Acknowledgements**

447 We are grateful to D. H. Funk from the Stround Water Research Center for providing the *Cloeon*  
448 *dipterum* specimens, S. Mbedi, K. Preuß, and L. Wächter for their great help with laboratory work,  
449 G. Glöckner, and C. Mazzoni for constructive comments about the analysis of the mitochondrial  
450 genomes, and Zedat-HPC at the Freie Universität Berlin, Germany for providing access to high-  
451 performance computing clusters. SR thanks the Janggen-Pöhn-Stiftung ([http://www.janggen-  
452 poehn.ch/](http://www.janggen-poehn.ch/)) for a Postdoctoral stipend. We also want to thank the members of our research groups for  
453 constructive working environments.

454

455

456

457 **Tables**

458 **Table 1** Set of mitochondrial genomes with according GenBank accession numbers

| Order           | Family             | Species                                         | Accession                          |
|-----------------|--------------------|-------------------------------------------------|------------------------------------|
| Archaeognatha   | Machilidae         | <i>Pedetontus silvestrii</i>                    | NC_011717                          |
| Archaeognatha   | Machilidae         | <i>Petrobius brevistylis</i>                    | NC_007688                          |
| Archaeognatha   | Machilidae         | <i>Songmachilis xinxiangensis</i>               | NC_021384                          |
| Archaeognatha   | Machilidae         | <i>Trigoniophthalmus alternatus</i>             | NC_010532                          |
| Archaeognatha   | Meinertellidae     | <i>Nesomachilis australica</i>                  | NC_006895                          |
| Blattodea       | Blattidae          | <i>Periplaneta americana</i>                    | NC_016956                          |
| Blattodea       | Blattidae          | <i>Periplaneta fuliginosa</i>                   | NC_006076                          |
| Blattodea       | Corydiidae         | <i>Eupolyphaga sinensis</i>                     | NC_014274                          |
| Blattodea       | Cryptocercidae     | <i>Cryptocercus relictus</i>                    | NC_018132                          |
| Blattodea       | Ectobiidae         | <i>Blattella bisignata</i>                      | NC_018549                          |
| Blattodea       | Ectobiidae         | <i>Blattella germanica</i>                      | NC_012901                          |
| Collembola      | Tetrodontophorinae | <i>Tetrodontophora bielanensis</i> <sup>a</sup> | NC_002735                          |
| Dermaptera      | Pygidicranidae     | <i>Challia fletcheri</i> <sup>a</sup>           | NC_018538                          |
| Embioptera      | Oligotomidae       | <i>Aposthonia japonica</i> <sup>a</sup>         | AB639034                           |
| Ephemeroptera   | Ameletidae         | <i>Ameletus</i> sp1                             | KM244682                           |
| Ephemeroptera   | Baetidae           | <i>Alainites yixiani</i>                        | NC_020034                          |
| Ephemeroptera   | Baetidae           | <i>Baetis rutilocylindratus</i>                 | XXXXXXXXXX                         |
| Ephemeroptera   | Baetidae           | <i>Cloeon dipterum</i>                          | XXXXXXXXXX                         |
| Ephemeroptera   | Caenidae           | <i>Caenis pycnacantha</i>                       | GQ502451                           |
| Ephemeroptera   | Ephemerellidae     | <i>Ephemerella</i> sp.                          | KM244691                           |
| Ephemeroptera   | Ephemerellidae     | <i>Vietnamella dabieshanensis</i>               | NC_020036                          |
| Ephemeroptera   | Ephemerellidae     | <i>Vietnamella</i> sp.                          | KM244655                           |
| Ephemeroptera   | Ephemeridae        | <i>Ephemerella orientalis</i>                   | NC_012645                          |
| Ephemeroptera   | Heptageniidae      | <i>Epeorus</i> sp.                              | KM244708                           |
| Ephemeroptera   | Heptageniidae      | <i>Paegniodes cupulatus</i>                     | NC_020035                          |
| Ephemeroptera   | Heptageniidae      | <i>Parafronurus youi</i>                        | NC_011359                          |
| Ephemeroptera   | Isonychiidae       | <i>Isonychia ignota</i>                         | NC_020037                          |
| Ephemeroptera   | Leptophlebiidae    | <i>Habrophlebiodes zijinensis</i>               | XXXXXXXXXX                         |
| Ephemeroptera   | Potamanthidae      | <i>Potamanthus</i> sp.                          | KM244674                           |
| Ephemeroptera   | Siphonuridae       | <i>Siphonurus immanis</i>                       | NC_013822                          |
| Ephemeroptera   | Siphonuridae       | <i>Siphonurus</i> sp.                           | KM244684                           |
| Ephemeroptera   | Siphuriscidae      | <i>Siphuriscus chinensis</i>                    | HQ875717                           |
| Ephemeroptera   | Teloganodidae      | sp.                                             | KM244670;<br>KM244703 <sup>b</sup> |
| Grylloblattodea | Grylloblattidae    | <i>Grylloblatta sculleni</i>                    | DQ241796                           |
| Isoptera        | Hodotermitidae     | <i>Microhodotermes viator</i>                   | NC_018122                          |
| Isoptera        | Kalotermitidae     | <i>Neotermes insularis</i>                      | NC_018124                          |
| Isoptera        | Rhinotermitidae    | <i>Coptotermes lacteus</i>                      | NC_018125                          |
| Isoptera        | Rhinotermitidae    | <i>Heterotermes</i> sp.                         | NC_018127                          |

|                  |                   |                                            |           |
|------------------|-------------------|--------------------------------------------|-----------|
| Isoptera         | Rhinotermitidae   | <i>Reticulitermes flavipes</i>             | NC_009498 |
| Isoptera         | Rhinotermitidae   | <i>Reticulitermes hageni</i>               | NC_009501 |
| Isoptera         | Rhinotermitidae   | <i>Schedorhinotermes breinli</i>           | NC_018126 |
| Isoptera         | Termitidae        | <i>Drepanotermes</i> sp.                   | NC_018129 |
| Isoptera         | Termitidae        | <i>Macrognathotermes errator</i>           | NC_018130 |
| Isoptera         | Termitidae        | <i>Macrotermes subhyalinus</i>             | NC_018128 |
| Isoptera         | Termitidae        | <i>Nasutitermes triodiae</i>               | NC_018131 |
| Isoptera         | Termopsidae       | <i>Porotermes adamsoni</i>                 | NC_018121 |
| Isoptera         | Termopsidae       | <i>Zootermopsis nevadensis</i>             | NC_024658 |
| Mantodea         | Caliridinae       | <i>Leptomantella albella</i>               | NC_024028 |
| Mantodea         | Mantidae          | <i>Tamolana tamolana</i>                   | NC_007702 |
| Mantophasmatodea | Mantophasmatidae  | <i>Sclerophasma paresisensis</i>           | NC_007701 |
| Odonata          | Calopterygidae    | <i>Vestalis melania</i>                    | NC_023233 |
| Odonata          | Coenagrionidae    | <i>Ischnura pumilio</i>                    | NC_021617 |
| Odonata          | Corduliidae       | <i>Cordulia aenea</i>                      | JX963627  |
| Odonata          | Epiophlebiidae    | <i>Epiophlebia superstes</i>               | NC_023232 |
| Odonata          | Euphaeidae        | <i>Euphaea formosa</i>                     | NC_014493 |
| Odonata          | Gomphidae         | <i>Davidius lunatus</i>                    | NC_012644 |
| Odonata          | Gomphidae         | <i>Ictinogomphus</i> sp.                   | KM244673  |
| Odonata          | Libellulidae      | <i>Hydrobasileus croceus</i>               | KM244659  |
| Odonata          | Libellulidae      | <i>Orthetrum triangulare melania</i>       | AB126005  |
| Odonata          | Pseudolestidae    | <i>Pseudolestes mirabilis</i>              | NC_020636 |
| Orthoptera       | Acrididae         | <i>Acrida willemsei</i>                    | NC_011303 |
| Orthoptera       | Acrididae         | <i>Calliptamus italicus</i>                | NC_011305 |
| Orthoptera       | Acrididae         | <i>Gomphocerus sibiricus</i>               | NC_021103 |
| Orthoptera       | Acrididae         | <i>Oedaleus decorus asiaticus</i>          | NC_011115 |
| Orthoptera       | Gryllotalpidae    | <i>Gryllotalpa orientalis</i> <sup>a</sup> | NC_006678 |
| Orthoptera       | Pneumoridae       | <i>Tanaocerus koebelei</i>                 | NC_020777 |
| Orthoptera       | Prophalangopsidae | <i>Tarragoilus diuturnus</i>               | NC_021397 |
| Orthoptera       | Pyrgomorphidae    | <i>Atractomorpha sinensis</i>              | NC_011824 |
| Orthoptera       | Rhaphidophoridae  | <i>Troglophilus neglectus</i>              | NC_011306 |
| Orthoptera       | Romaleidae        | <i>Xyleus modestus</i>                     | NC_014490 |
| Orthoptera       | Tetrigidae        | <i>Tetrix japonica</i>                     | NC_018543 |
| Orthoptera       | Tettigoniidae     | <i>Gampsocleis gratiosa</i>                | NC_011200 |
| Orthoptera       | Tettigoniidae     | <i>Ruspolia dubia</i>                      | NC_009876 |
| Phasmatodea      | Bacillidae        | <i>Bacillus rossius</i>                    | GU001956  |
| Phasmatodea      | Diapheromeridae   | <i>Micadina phluctainoides</i>             | NC_014673 |
| Phasmatodea      | Diapheromeridae   | <i>Sipyloidea sipylus</i>                  | AB477470  |
| Phasmatodea      | Heteropterygidae  | <i>Heteropteryx dilatata</i>               | NC_014680 |
| Phasmatodea      | Heteropterygidae  | <i>Orestes mouhotii</i>                    | AB477462  |
| Phasmatodea      | Phasmatidae       | <i>Entoria okinawaensis</i>                | NC_014694 |
| Phasmatodea      | Phasmatidae       | <i>Extatosoma tiaratum</i>                 | NC_017748 |
| Phasmatodea      | Phasmatidae       | <i>Megacrana alpheus adan</i>              | NC_014688 |

|             |                 |                                      |           |
|-------------|-----------------|--------------------------------------|-----------|
| Phasmatodea | Phasmatidae     | <i>Neohirasea japonica</i>           | AB477469  |
| Phasmatodea | Phasmatidae     | <i>Phobaeticus serratipes</i>        | NC_014678 |
| Phasmatodea | Phasmatidae     | <i>Phraortes</i> sp. <sup>a</sup>    | NC_014705 |
| Phasmatodea | Phasmatidae     | <i>Ramulus irregulariterdentatus</i> | NC_014702 |
| Phasmatodea | Timematidae     | <i>Timema californicum</i>           | DQ241799  |
| Plecoptera  | Perlidae        | <i>Dinocras cephalotes</i>           | NC_022843 |
| Plecoptera  | Perlidae        | <i>Kamimuria wangi</i>               | NC_024033 |
| Plecoptera  | Perlidae        | <i>Togoperla</i> sp.                 | KM409708  |
| Plecoptera  | Pteronarcyidae  | <i>Pteronarcys princeps</i>          | NC_006133 |
| Zygentoma   | Lepidotrichidae | <i>Tricholepidion gertschi</i>       | NC_005437 |
| Zygentoma   | Lepismatidae    | <i>Thermobia domestica</i>           | NC_006080 |
| Zygentoma   | Nicoletiidae    | <i>Atelura formicaria</i>            | NC_011197 |

---

459 <sup>a</sup>, Taxa were excluded in the optimized\_taxa matrix (see Methods).

460 <sup>b</sup>, Represents sequence consisting of two genomic fragments (contigs) from the same sample.

461

462

463

464

465

466

467

468

469

470

471 **Figures**

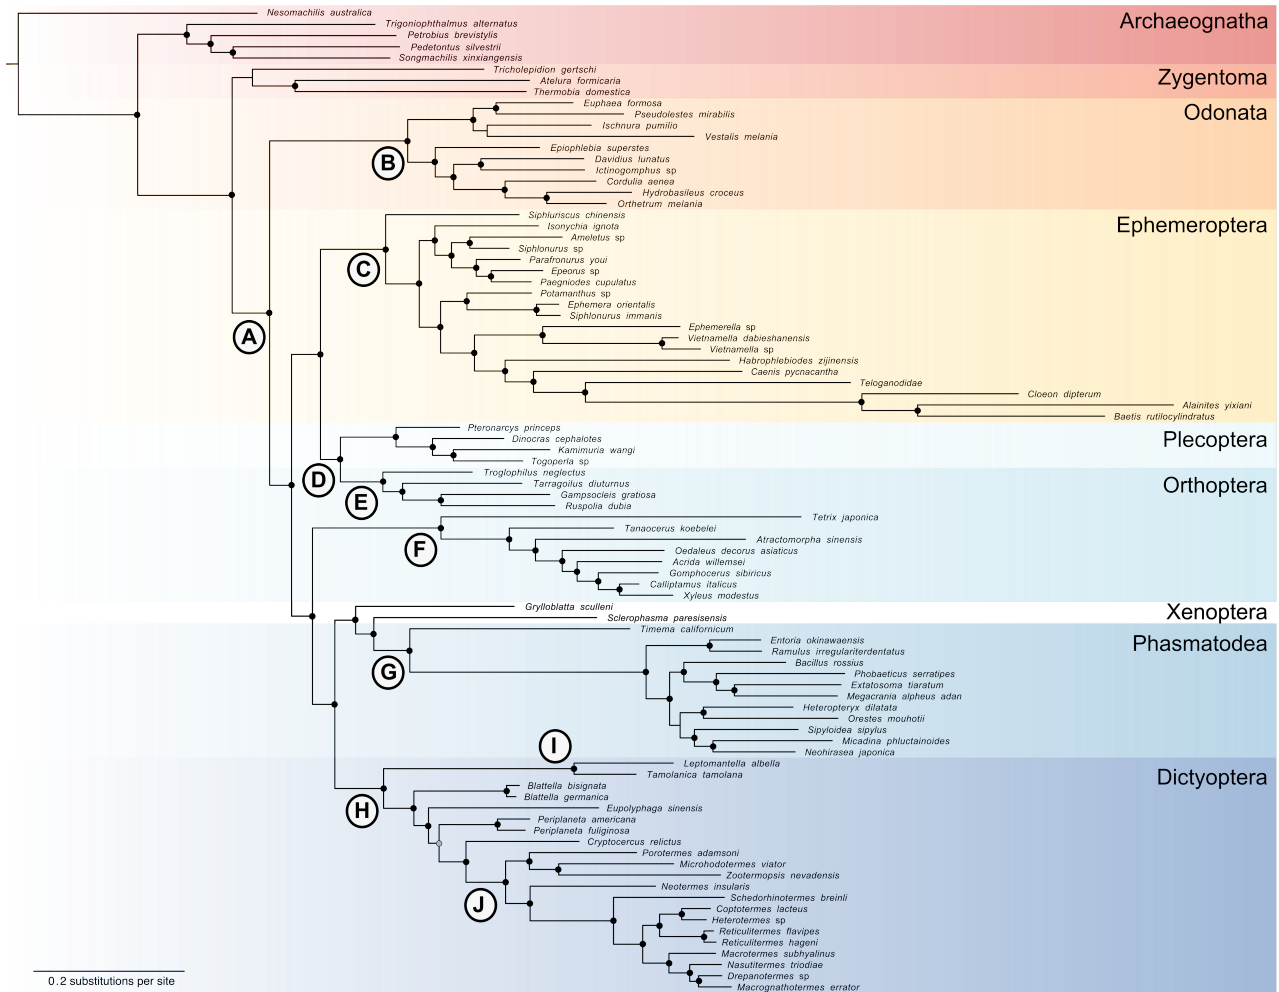

472

473 **Fig. 1** Phylogenetic relationships of insect major orders using Bayesian inference reconstruction  
 474 based on mitochondrial genome data using the concatenated amino acid sequences of the  
 475 optimized\_taxa matrix (see Table 1). Filled circles indicate supported nodes; whereby black circles  
 476 represent Bayesian posterior probability (BPP) = 1, and grey circles BPP  $\geq$  0.95. Letters indicate  
 477 clades mentioned in the text (see also Table 3)



(a) *Cloeon dipterum* L. 1761

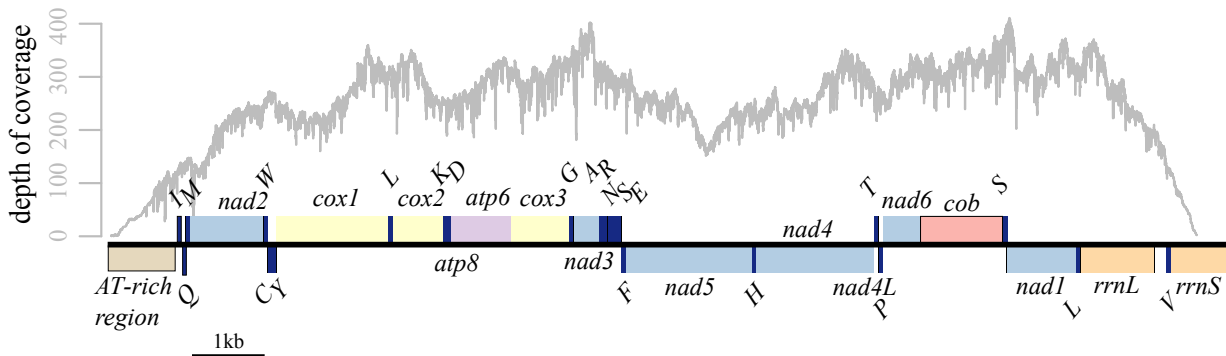

(b) *Baetis rutilocylindratus* Wang, Qin, Cheng & Zhou, 2011

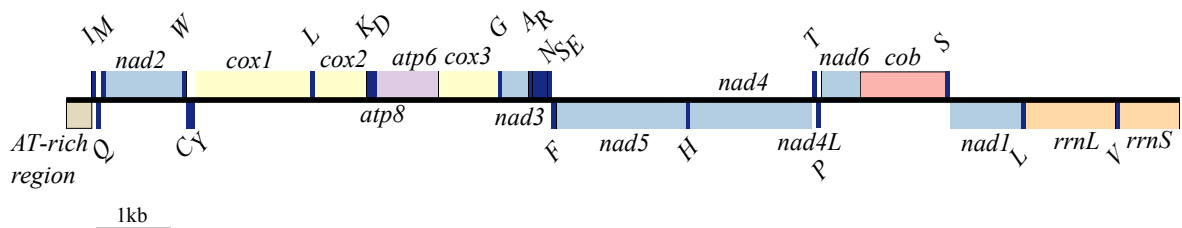

(c) *Habrophlebiodes zijinensis* Gui, Zhang & Wu, 1996

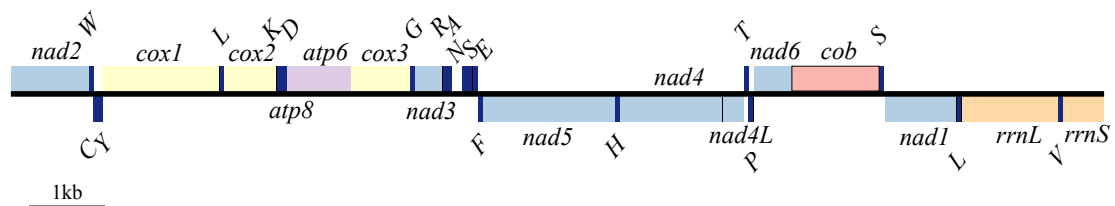

478

479 **Fig. 2** Mitochondrial genome maps of three sequenced Ephemeroptera species. The nearly complete  
 480 mitochondrial genome of (a) *Cloeon dipterum*, including coverage depth, the complete  
 481 mitochondrial genome of (b) *Baetis rutilocylindratus*, and the incomplete mitochondrial genome of  
 482 (c) *Habrophlebiodes zijinensis*. Transfer RNA genes are indicated by single-letter IUPAC-IUB  
 483 abbreviations for their corresponding amino acid. Protein coding genes and ribosomal RNA genes  
 484 are listed and colored in the following way: *atp6*, *atp8*, ATP synthase subunits 6 and 8 genes (violet);  
 485 *cob*, cytochrome oxidase *b* gene (red); *cox1*-*cox3*, cytochrome oxidase *c* subunit 1-3 genes (yellow);  
 486 *nad1*-6, *nad4L*, NADH dehydrogenase subunits 1-6 and 4L (light blue); *rrnS*, *rrnL*, small and large  
 487 ribosomal RNA subunits (orange); AT-rich region (brown). Genes located at the (+) strand appear  
 488 above the central line. Genes located on the (-) strand appear below the central line.

489

490 **Additional files**

491 **Additional file 1: Table S1.** Universal primers for Sanger sequencing. List of primer pairs used for  
492 the PCR amplification and Sanger sequencing of *Baetis rutilocylindratus* (Baetidae) and  
493 *Habrophlebiodes zijinensis* (Leptophlebiidae).

494 **Additional file 2: Fig. S1.** Phylogenetic relationships of insect major orders using Bayesian  
495 inference reconstruction based on mitochondrial genome data using the concatenated amino acid  
496 sequences of the all\_taxa matrix (see Table 1). Filled circles indicate well-supported nodes; whereby  
497 black circles represent Bayesian posterior probability (BPP) = 1, and grey circles BPP  $\geq$  0.95. Scale  
498 bar indicates substitutions per site. Coloured tip labels refer to the orders, whereby light blue =  
499 Archaeognatha (AR), dark blue = Blattodea (BL), light green = Ephemeroptera (EP), dark green =  
500 Grylloblattodea (GR), red = Isoptera (IS), light orange = Mantodea (MT), dark red =  
501 Mantophasmatodea (MP), dark orange = Odonata (OD), light purple = Orthoptera (OR), dark purple  
502 = Phasmatodea, yellow = Plecoptera (PL), and brown = Zygentoma (ZY). Five taxa being excluded  
503 from the optimized\_taxa matrix are coloured in dark grey.

504 **Additional file 3: Fig. S2.** Phylogenetic relationships of insect major orders using maximum  
505 likelihood reconstruction based on mitochondrial genome data using the concatenated amino acid  
506 sequences of the optimized\_taxa matrix (see Table 1). Filled circles indicate well-supported nodes;  
507 whereby black circles represent Bootstrap Support (BS)  $\geq$  90, and grey circles BS  $\geq$  80. Scale bar  
508 indicates substitutions per site. Coloured tip labels refer to the orders (for details see Additional file  
509 2: Figure S1).

510 **Additional file 4: Fig. S3.** Phylogenetic relationships of insect major orders using maximum  
511 likelihood reconstruction based on mitochondrial genome data using the concatenated amino acid  
512 sequences of the all\_taxa matrix (see Table 1). Filled circles indicate well-supported nodes; whereby  
513 black circles represent Bootstrap Support (BS)  $\geq$  90, and grey circles BS  $\geq$  80. Scale bar indicates

514 substitutions per site. Coloured tip labels refer to the orders with the exception of taxa being  
515 excluded from the optimized\_taxa matrix coloured in dark grey (for details see Additional file 2:  
516 Figure S1).

517 **Additional file 5: Table S2.** Overview of ephemeropteran mitochondrial genomes. Total sequence  
518 length in base pairs (bp) and individual nucleotide compositions of mayfly mitochondrial genomes  
519 calculated based on the whole available sequences and the ones corrected for the incomplete  
520 mitochondrial genomes (see Methods).

521

## 522 **References**

- 523 1. Hovmöller R. The Palaeoptera Problem: Basal Pterygote Phylogeny Inferred from 18S and 28S  
524 rDNA Sequences. *Cladistics*. 2002;18:313–23.
- 525 2. Ogden HT, Whiting MF. The problem with “the Paleoptera Problem:” sense and sensitivity.  
526 *Cladistics*. 2003;19:432–42.
- 527 3. Trautwein MD, Wiegmann BM, Beutel R, Kjer KM, Yeates DK. Advances in Insect Phylogeny at  
528 the Dawn of the Postgenomic Era. *Annu. Rev. Entomol.* 2012;57:449–68.
- 529 4. Whitfield JB, Kjer KM. Ancient Rapid Radiations of Insects: Challenges for Phylogenetic  
530 Analysis. *Annu. Rev. Entomol.* 2008;53:449–72.
- 531 5. Ishiwata K, Sasaki G, Ogawa J, Miyata T, Su Z-H. Phylogenetic relationships among insect orders  
532 based on three nuclear protein-coding gene sequences. *Mol. Phylogenet. Evol.* 2011;58:169–80.
- 533 6. Yeates DK, Cameron SL, Trautwein M. A view from the edge of the forest: recent progress in  
534 understanding the relationships of the insect orders. *Australian Journal of Entomology*. 2012;51:79–  
535 87.
- 536 7. Kjer KM, Simon C, Yavorskaya M, Beutel RG. Progress, pitfalls and parallel universes: a history  
537 of insect phylogenetics. *J R Soc Interface*. 2016;13:20160363.
- 538 8. Mallatt J, Giribet G. Further use of nearly complete 28S and 18S rRNA genes to classify  
539 Ecdysozoa: 37 more arthropods and a kinorhynch. *Mol. Phylogenet. Evol.* 2006;40:772–94.
- 540 9. Meusemann K, Reumont von BM, Simon S, Roeding F, Strauss S, Kuck P, et al. A Phylogenomic  
541 Approach to Resolve the Arthropod Tree of Life. *Mol. Biol. Evol.* 2010;27:2451–64.
- 542 10. Song N, Li H, Song F, Cai W. Molecular phylogeny of Polyneoptera (Insecta) inferred from  
543 expanded mitogenomic data. *Nature Publishing Group*. 2016;6:36175.
- 544 11. Kjer KM, Carie FL, Litman J, Ware J. A Molecular Phylogeny of Hexapoda. *Arthropod*

- 545 Systematics & Phylogeny. 2006;64:35–44.
- 546 12. Thomas JA, Trueman JWH, Rambaut A, Welch JJ. Relaxed Phylogenetics and the Palaeoptera  
547 Problem: Resolving Deep Ancestral Splits in the Insect Phylogeny. *Syst. Biol.* 2013;62:285–97.
- 548 13. Sasaki G, Ishiwata K, Machida R, Miyata T, Su Z-H. Molecular phylogenetic analyses support  
549 the monophyly of Hexapoda and suggest the paraphyly of Entognatha. *BMC Evol. Biol. BioMed*  
550 *Central*; 2013;13:236.
- 551 14. Reumont von BM, Jenner RA, Wills MA, Dell'Ampio E, Pass G, Ebersberger I, et al.  
552 Pancrustacean Phylogeny in the Light of New Phylogenomic Data: Support for Remipedia as the  
553 Possible Sister Group of Hexapoda. *Mol. Biol. Evol.* 2012;29:1031–45.
- 554 15. Regier JC, Shultz JW, Zwick A, Hussey A, Ball B, Wetzer R, et al. Arthropod relationships  
555 revealed by phylogenomic analysis of nuclear protein-coding sequences. *Nature.* 2010;463:1079–83.
- 556 16. Ma C, Wang Y, Wu C, Kang L, Liu C. The compact mitochondrial genome of *Zorotypus*  
557 *medoensis* provides insights into phylogenetic position of Zoraptera. *BMC Genomics.* 2014;15:1156.
- 558 17. Zhang J, Zhou C, Gai Y, Song D, Zhou K. The complete mitochondrial genome of *Parafronurus*  
559 *youi* (Insecta: Ephemeroptera) and phylogenetic position of the Ephemeroptera. *Gene.* 2008;424:18–  
560 24.
- 561 18. Whiting MF, Carpenter JC, Wheeler QD, Wheeler WC. The Strepsiptera problem: phylogeny of  
562 the holometabolous insect orders inferred from 18S and 28S ribosomal DNA sequences and  
563 morphology. *Syst. Biol.* 1997;46:1–68.
- 564 19. Giribet G, Ribera C. A Review of Arthropod Phylogeny: New Data Based on Ribosomal DNA  
565 Sequences and Direct Character Optimization. *Cladistics.* 2000;16:204–31.
- 566 20. Ma Y, He K, Yu P, Yu D, Cheng X, Zhang J. The complete mitochondrial genomes of three  
567 bristletails (Insecta: Archaeognatha): the paraphyly of Machilidae and insights into archaeognathan  
568 phylogeny. Sun G, editor. *PLoS One.* 2015;10:e0117669.
- 569 21. Wheeler WC, Whiting M, Wheeler QD, Carpenter JM, Carpenter. The Phylogeny of the Extant  
570 Hexapod Orders. *Cladistics.* 2001;17:113–69.
- 571 22. Lin C-P, Chen M-Y, Huang J-P. The complete mitochondrial genome and phylogenomics of a  
572 damselfly, *Euphaea formosa* support a basal Odonata within the Pterygota. *Gene.* 2010;468:20–9.
- 573 23. Wan X, Kim MI, Kim MJ, Kim I. Complete Mitochondrial Genome of the Free-Living Earwig,  
574 *Challia fletcheri* (Dermaptera: Pygidicranidae) and Phylogeny of Polyneoptera. *PLoS One.*  
575 2012;7:e42056.
- 576 24. Kjer K. Aligned 18S and Insect Phylogeny. *Syst. Biol.* 2004;53:506–14.
- 577 25. Misof B, Niehuis O, Bischoff I, Rickert A, Erpenbeck D, Staniczek A. Towards an 18S  
578 phylogeny of hexapods: Accounting for group-specific character covariance in optimized mixed  
579 nucleotide/doublet models. *Zoology.* 2007;110:409–29.
- 580 26. Reumont von BM, Meusemann K, Szucsich NU, Dell'Ampio E, Gowri-Shankar V, Bartel D, et  
581 al. Can comprehensive background knowledge be incorporated into substitution models to improve

- 582 phylogenetic analyses? A case study on major arthropod relationships. *BMC Evol. Biol.* 2009;9:119.
- 583 27. Yoshizawa K, Johnson KP. Aligned 18S for Zoraptera (Insecta): phylogenetic position and  
584 molecular evolution. *Mol. Phylogenet. Evol.* 2005;37:572–80.
- 585 28. Blanke A, Greve C, Wipfler B, Beutel RG, Holland BR, Misof B. The Identification of  
586 Concerted Convergence in Insect Heads Corroborates Palaeoptera. *Syst. Biol.* 2013;62:250–63.
- 587 29. Simon S, Strauss S, Haeseler von A, Hadrys H. A Phylogenomic Approach to Resolve the Basal  
588 Pterygote Divergence. *Mol. Biol. Evol.* 2009;26:2719–30.
- 589 30. Baurain D, Brinkmann H, Philippe H. Lack of resolution in the animal phylogeny: closely spaced  
590 cladogeneses or undetected systematic errors? *Mol. Biol. Evol.* 2007;24:6–9.
- 591 31. Rokas A, Carroll SB. Bushes in the tree of life. *PLoS Biol. Public Library of Science*;  
592 2006;4:e352.
- 593 32. Whitfield JB, Lockhart PJ. Deciphering ancient rapid radiations. *Trends Ecol. Evol.*  
594 2007;22:258–65.
- 595 33. Talavera G, Vila R. What is the phylogenetic signal limit from mitogenomes? The reconciliation  
596 between mitochondrial and nuclear data in the Insecta class phylogeny. *BMC Evol. Biol.*  
597 2011;11:315.
- 598 34. Abascal F, Zardoya R, Posada D. ProtTest: selection of best-fit models of protein evolution.  
599 *Bioinformatics.* 2005;21:2104–5.
- 600 35. Abascal F, Posada D, Zardoya R. MtArt: A New Model of Amino Acid Replacement for  
601 Arthropoda. *Mol. Biol. Evol.* 2006;24:1–5.
- 602 36. Le VS, Dang CC, Le QS. Improved mitochondrial amino acid substitution models for metazoan  
603 evolutionary studies. *BMC Evol. Biol. BioMed Central*; 2017;17:136.
- 604 37. Bensasson D. Mitochondrial pseudogenes: evolution's misplaced witnesses. *Trends Ecol. Evol.*  
605 2001;16:314–21.
- 606 38. Rogers HH, Griffiths-Jones S. Mitochondrial Pseudogenes in the Nuclear Genomes of  
607 *Drosophila*. *PLoS One.* 2012;7:e32593.
- 608 39. Song H, Buhay JE, Whiting MF, Crandall KA. Many species in one: DNA barcoding  
609 overestimates the number of species when nuclear mitochondrial pseudogenes are coamplified. *Proc.*  
610 *Natl. Acad. Sci. U.S.A.* 2008;105:13486–91.
- 611 40. Claes KBM, De Leeneer K. Dealing with pseudogenes in molecular diagnostics in the next-  
612 generation sequencing era. *Methods Mol. Biol. New York, NY: Springer New York*;  
613 2014;1167:303–15.
- 614 41. Cameron SL. Insect Mitochondrial Genomics: Implications for Evolution and Phylogeny. *Annu.*  
615 *Rev. Entomol.* 2014;59:95–117.
- 616 42. Boore JL. Animal mitochondrial genomes. *Nucleic Acids Res.* 1999;27:1767–80.

- 617 43. Saito S. Replication Origin of Mitochondrial DNA in Insects. *Genetics*. 2005;171:1695–705.
- 618 44. Zhang D-X, Hewitt GM. Insect mitochondrial control region: A review of its structure, evolution  
619 and usefulness in evolutionary studies. *Biochem. Sys. Ecol.* 1997;25:99–120.
- 620 45. Boore JL, Collins TM, Stanton D, Daehler LL, Brown WM. Deducing the pattern of arthropod  
621 phylogeny from mitochondrial DNA rearrangements. *Nature*. 1995;376:163–5.
- 622 46. Robinson GE, Hackett KJ, Purcell-Miramontes M, Brown SJ, Evans JD, Goldsmith MR, et al.  
623 Creating a buzz about insect genomes. Sills J, editor. *Science. American Association for the*  
624 *Advancement of Science*; 2011;331:1386–6.
- 625 47. Barber-James HM, Gattolliat J-L, Sartori M, Hubbard MD. Global diversity of mayflies  
626 (Ephemeroptera, Insecta) in freshwater. *Hydrobiologia*. Springer Netherlands; 2008;595:339–50.
- 627 48. Dijkstra K-DB, Bechly G, Bybee SM, Dow RA, Dumont HJ, Fleck G, et al. The classification  
628 and diversity of dragonflies and damselflies (Odonata). In: Zhang Z-Q, editor. 2013. pp. 36–45.
- 629 49. Rutschmann S, Detering H, Simon S, Fredslund J, Monaghan MT. discomark: nuclear marker  
630 discovery from orthologous sequences using draft genome data. *Mol. Ecol. Resour.* 2017;17:257–66.
- 631 50. Altschul S. Gapped BLAST and PSI-BLAST: a new generation of protein database search  
632 programs. *Nucleic Acids Res.* 1997;25:3389–402.
- 633 51. Li H, Durbin R. Fast and accurate short read alignment with Burrows-Wheeler transform.  
634 *Bioinformatics*. 2009;25:1754–60.
- 635 52. Li H, Durbin R. Fast and accurate long-read alignment with Burrows-Wheeler transform.  
636 *Bioinformatics*. 2010;26:589–95.
- 637 53. Salmela L, Schroder J. Correcting errors in short reads by multiple alignments. *Bioinformatics*.  
638 2011;27:1455–61.
- 639 54. Simon C, Frati F, Beckenbach A, Crespi B, Liu H, Flook P. Evolution, Weighting, and  
640 Phylogenetic Utility of Mitochondrial Gene Sequences and a Compilation of Conserved Polymerase  
641 Chain Reaction Primers. *Annals of the Entomological Society of America*. Oxford University Press;  
642 1994;87:651–701.
- 643 55. Li D, Qin J-C, Zhou C-F. The phylogeny of Ephemeroptera in Pterygota revealed by the  
644 mitochondrial genome of *Siphuriscus chinensis* (Hexapoda: Insecta). *Gene*. 2014;545:132–40.
- 645 56. Aberer AJ, Krompass D, Stamatakis A. Pruning Rogue Taxa Improves Phylogenetic Accuracy:  
646 An Efficient Algorithm and Webservice. *Syst. Biol.* 2012;62:162–6.
- 647 57. Wilkinson M. Majority-rule reduced consensus trees and their use in bootstrapping. *Mol. Biol.*  
648 *Evol.* 1996;13:437–44.
- 649 58. Felsenstein J. Cases in which Parsimony or Compatibility Methods Will be Positively  
650 Misleading. *Systematic Zoology*. 1978;27:401.
- 651 59. Hedtke SM, Townsend TM, Hillis DM. Resolution of phylogenetic conflict in large data sets by  
652 increased taxon sampling. *Syst. Biol.* 2006;55:522–9.

- 653 60. Landan G, Graur D. Local reliability measures from sets of co-optimal multiple sequence  
654 alignments. *Pac Symp Biocomput.* 2008;:15–24.
- 655 61. Sela I, Ashkenazy H, Katoh K, Pupko T. GUIDANCE2: accurate detection of unreliable  
656 alignment regions accounting for the uncertainty of multiple parameters. *Nucleic Acids Res.*  
657 2015;43:W7–14.
- 658 62. Katoh K, Standley DM. MAFFT Multiple Sequence Alignment Software Version 7:  
659 Improvements in Performance and Usability. *Mol. Biol. Evol.* 2013;30:772–80.
- 660 63. Lanfear R, Calcott B, Ho SYW, Guindon S. PartitionFinder: Combined Selection of Partitioning  
661 Schemes and Substitution Models for Phylogenetic Analyses. *Mol. Biol. Evol.* 2012;29:1695–701.
- 662 64. Stamatakis A. RAxML version 8: a tool for phylogenetic analysis and post-analysis of large  
663 phylogenies. *Bioinformatics.* 2014;30:1312–3.
- 664 65. Bergsten J. A review of long-branch attraction. *Cladistics.* 2005;21:163–93.
- 665 66. Kück P, Struck TH. BaCoCa – A heuristic software tool for the parallel assessment of sequence  
666 biases in hundreds of gene and taxon partitions. *Mol. Phylogenet. Evol.* 2014;70:94–8.
- 667 67. Ronquist F, Teslenko M, van der Mark P, Ayres DL, Darling A, Höhna S, et al. MrBayes 3.2:  
668 Efficient Bayesian Phylogenetic Inference and Model Choice Across a Large Model Space. *Syst.*  
669 *Biol.* 2012;61:539–42.
- 670 68. Paradis E, Claude J, Strimmer K. APE: Analyses of Phylogenetics and Evolution in R language.  
671 *Bioinformatics.* 2004;20:289–90.
- 672 69. Schliep KP. phangorn: phylogenetic analysis in R. *Bioinformatics.* 2011;27:592–3.
- 673 70. Yu G, Smith DK, Zhu H, Guan Y, Lam TT-Y. ggtree: an r package for visualization and  
674 annotation of phylogenetic trees with their covariates and other associated data. *Methods Ecol Evol.*  
675 2017;8:28–36.
- 676 71. R Development Core Team. R: A language and environment for statistical computing. R  
677 Foundation for Statistical Computing, Vienna, Austria. *International Statistical Review.* 2012. pp.  
678 357–70.
- 679 72. Bernt M, Donath A, Jühling F, Externbrink F, Florentz C, Fritsch G, et al. MITOS: Improved de  
680 novo metazoan mitochondrial genome annotation. *Mol. Phylogenet. Evol.* 2013;69:313–9.
- 681 73. Wyman SK, Jansen RK, Boore JL. Automatic annotation of organellar genomes with DOGMA.  
682 *Bioinformatics.* 2004;20:3252–5.
- 683 74. Laslett D, Canback B. ARWEN: a program to detect tRNA genes in metazoan mitochondrial  
684 nucleotide sequences. *Bioinformatics.* 2008;24:172–5.
- 685 75. Lowe TM, Eddy SR. tRNAscan-SE: a program for improved detection of transfer RNA genes in  
686 genomic sequence. *Nucleic Acids Res.* Oxford University Press; 1997;25:955–64.
- 687 76. Lohse M, Drechsel O, Kahlau S, Bock R. OrganellarGenomeDRAW--a suite of tools for  
688 generating physical maps of plastid and mitochondrial genomes and visualizing expression data sets.

- 689 Nucleic Acids Res. 2013;41:W575–81.
- 690 77. Perna N, Kocher T. Patterns of nucleotide composition at fourfold degenerate sites of animal  
691 mitochondrial genomes. J Mol Evol. 1995;41.
- 692 78. Rota-Stabelli O, Yang Z, Telford MJ. MtZoa: a general mitochondrial amino acid substitutions  
693 model for animal evolutionary studies. Mol. Phylogenet. Evol. 2009;52:268–72.
- 694 79. Misof B, Liu S, Meusemann K, Peters RS, Donath A, Mayer C, et al. Phylogenomics resolves the  
695 timing and pattern of insect evolution. Science. 2014;346:763–7.
- 696 80. Simon S, Narechania A, DeSalle R, Hadrys H. Insect Phylogenomics: Exploring the Source of  
697 Incongruence Using New Transcriptomic Data. Genome Biol. Evol. 2012;4:1295–309.
- 698 81. Ogden TH, Whiting MF. Phylogeny of Ephemeroptera (mayflies) based on molecular evidence.  
699 Mol. Phylogenet. Evol. 2005;37:625–43.
- 700 82. Ogden TH, Gattolliat JL, Sartori M, Staniczek AH, Soldán T, Whiting MF. Towards a new  
701 paradigm in mayfly phylogeny (Ephemeroptera): combined analysis of morphological and molecular  
702 data. Sys. Entomol. 2009;34:616–34.
- 703 83. Letsch HO, Meusemann K, Wipfler B, Schütte K, Beutel R, Misof B. Insect phylogenomics:  
704 results, problems and the impact of matrix composition. Proc. R. Soc. B. 2012;279:3282–90.
- 705 84. Letsch H, Simon S. Insect phylogenomics: new insights on the relationships of lower neopteran  
706 orders (Polyneoptera). Sys. Entomol. 2013;38:783–93.
- 707 85. Zhang Y-Y, Xuan W-J, Zhao J-L, Zhu C-D, Jiang G-F. The complete mitochondrial genome of  
708 the cockroach *Eupolyphaga sinensis* (Blattaria: Polyphagidae) and the phylogenetic relationships  
709 within the Dictyoptera. Mol. Biol. Rep. 2009;37:3509–16.
- 710 86. Fenn JD, Song H, Cameron SL, Whiting MF. A preliminary mitochondrial genome phylogeny of  
711 Orthoptera (Insecta) and approaches to maximizing phylogenetic signal found within mitochondrial  
712 genome data. Mol. Phylogenet. Evol. 2008;49:59–68.
- 713 87. Ma C, Liu C, Yang P, Kang L. The complete mitochondrial genomes of two band-winged  
714 grasshoppers, *Gastrimargus marmoratus* and *Oedaleus asiaticus*. BMC Genomics. 2009;10:156.
- 715 88. Inward D, Beccaloni G, Eggleton P. Death of an order: a comprehensive molecular phylogenetic  
716 study confirms that termites are eusocial cockroaches. Biology Letters. 2007;3:331–5.
- 717 89. Legendre F, Nel A, Svenson GJ, Robillard T, Pellens R, Grandcolas P. Phylogeny of  
718 Dictyoptera: Dating the Origin of Cockroaches, Praying Mantises and Termites with Molecular Data  
719 and Controlled Fossil Evidence. PLoS One. 2015;10:e0130127.
- 720 90. Regier JC, Mitter C, Zwick A, Bazinet AL, Cummings MP, Kawahara AY, et al. A large-scale,  
721 higher-level, molecular phylogenetic study of the insect order Lepidoptera (moths and butterflies).  
722 Moreau CS, editor. PLoS One. 2013;8:e58568.
- 723 91. Wu H-Y, Ji X-Y, Yu W-W, Du Y-Z. Complete mitochondrial genome of the stonefly  
724 *Cryptoperla stilifera* Sivec (Plecoptera: Peltoperlidae) and the phylogeny of Polyneopteran insects.  
725 Gene. 2014;537:177–83.



- 726 92. Pons J, Bauzà-Ribot MM, Jaume D, Juan C. Next-generation sequencing, phylogenetic signal  
727 and comparative mitogenomic analyses in Metacrangonyctidae (Amphipoda: Crustacea). BMC  
728 Genomics. 2014;15:566.
- 729 93. Tang M, Tan M, Meng G, Yang S, Su X, Liu S, et al. Multiplex sequencing of pooled  
730 mitochondrial genomes--a crucial step toward biodiversity analysis using mito-metagenomics.  
731 Nucleic Acids Res. 2014;42:e166–6.
- 732 94. Lee EM, Hong MY, Kim MI, Kim MJ, Park HC, Kim KY, et al. The complete mitogenome  
733 sequences of the palaeopteran insects *Ephemera orientalis* (Ephemeroptera: Ephemeridae) and  
734 *Davidius lunatus* (Odonata: Gomphidae). Genome. 2009;52:810–7.
- 735 95. Kim MJ, Jung KS, Park NS, Wan X, Kim K-G, Jun J, et al. Molecular phylogeny of the higher  
736 taxa of Odonata (Insecta) inferred from COI, 16S rRNA, 28S rRNA, and EF1- $\alpha$  sequences.  
737 Entomological Research. 2014;44:65–79.

738
